# Supplementary material for: Cytokine RT-qPCR and ddPCR for immunological investigations of the endangered Australian sea lion (Neophoca cinerea) and other mammals
Source: PeerJ. 2020 Nov 13;8:e10306. doi: 10.7717/peerj.10306 (PMC7668205; doi:10.7717/peerj.10306)
Supplement: Supplemental Information 5 — Excel spreadsheets with the standard curves and calculations for Limit of detection and limit of quantification for IL-4 and IFNy primer sets described in the manuscript. [file peerj-08-10306-s005.xlsx]

## Sheet: IL-4
IL-4		CALIBRATION CURVE ANALYSIS FOR LOD/LOQ
Sample name	log10 copies (x)	Cq (Response) (y)	SQ copies
Std-01	6	18.79	1000000
Std-01	6	19.01	1000000
Std-01	6	18.85	1000000									Y=aX + b
Std-01	6	18.87	1000000									Y=	Predicted values of Y
Std-01	6	18.56	1000000									a=	slope = Rate of predicted ꜛꜜ for Y scores for each unit increase in X
Std-01	6	18.82	1000000									b=	Y-intercept = level of Y when x is 0
Std-02	5	22.1	100000
Std-02	5	22.2	100000									Efficiency	2.00877
Std-02	5	22.13	100000										100.877
Std-02	5	21.92	100000
Std-02	5	21.9	100000
Std-02	5	21.77	100000
Std-03	4	25.79	10000
Std-03	4	25.24	10000
Std-03	4	25.28	10000	Data Analysis Regression (Excel--> Data --> Data Analysis --> Regression								RESULTS LOD/LOQ
Std-03	4	25.42	10000	SUMMARY OUTPUT								IL-4
Std-03	4	25.19	10000									Parameter	Meaning	Value
Std-03	4	25.21	10000	Regression Statistics								Slope	a	3.3011
Std-04	3	28.91	1000	Multiple R								Intercept	b	38.604
Std-04	3	29.19	1000	R Square	0.996233
Std-04	3	28.4	1000	Adjusted R Square	0.996137							Correlation Coefficient	R2	0.996
Std-04	3	28.57	1000	Standard Error	0.409562							SE of intercept	EXCEL function (data analysis > regression > Third table)	0.118611
Std-04	3	28.5	1000	Observations	41							SD of intercept	SE of intercept * √n (n= observations)	0.759481
Std-04	3	28.63	1000									LOD	3.3 (SD of intercept/slope)	0.759228	log10 copies
Std-05	2	32.02	100	ANOVA								LOQ	10 (SD of intercept/slope)	2.29993	log10 copies
Std-05	2	32.47	100		df	SS	MS	F	Significance F
Std-05	2	31.87	100	Regression	1	1730.26	1730.26	10315.1	6.8471e-49			LOD		5.74418	Copies
Std-05	2	32.23	100	Residual	39	6.54189	0.167741					LOQ		199.492	Copies
Std-05	2	32.15	100	Total	40	1736.8
Std-05	2	32.21	100
Std-06	1	35.97	10		Coefficients	Standard Error	t Stat	P-value	Lower 95%	Upper 95%	Lower 95.0%	Upper 95.0%
Std-06	1	35.57	10	Intercept	38.6041	0.118611	325.468	1.37574e-68	38.3642	38.844	38.3642	38.844
Std-06	1	35.07	10	X Variable 1	-3.30108	0.0325028	-101.563	6.8471e-49	-3.36683	-3.23534	-3.36683	-3.23534
Std-06	1	35.74	10
Std-06	1	34.94	10
Std-06	1	35.91	10
Std-07	0	38.76	1
Std-07	0	38.27	1
Std-07	0	39.22	1
Std-07	0	36.77	1
Std-07	0	38.41	1
Std-07	0	0	1
																	This should be a Ct value of 36 for IL-4

## Sheet: IFNy
IFNy	CALIBRATION CURVE ANALYSIS FOR LOD/LOQ
Sample name	log10 copies (x)	Cq (Response) (y)	SQ copies
Std-1	6	20.6937	1000000
Std-1	6	20.5762	1000000
Std-1	6	20.6914	1000000										Y=aX + b
Std-1	6	20.4716	1000000										Y=	Predicted values of Y
Std-1	6	20.5734	1000000										a=	slope = Rate of predicted ꜛꜜ for Y scores for each unit increase in X
Std-1	6	20.5705	1000000										b=	Y-intercept = level of Y when x is 0
Std-2	5	23.9453	100000
Std-2	5	23.5805	100000										Efficiency	2.00795
Std-2	5	23.6342	100000											100.795
Std-2	5	23.842	100000
Std-2	5	23.8409	100000
Std-2	5	23.744	100000
Std-3	4	28.1147	10000
Std-3	4	26.9907	10000
Std-3	4	27.4291	10000										RESULTS LOD/LOQ
Std-3	4	27.3851	10000										IFNy
Std-3	4	27.3757	10000		Data Analysis Regression (Excel--> Data --> Data Analysis --> Regression								Parameter	Meaning	Value
Std-3	4	27.5374	10000		SUMMARY OUTPUT								Slope	a	3.303
Std-4	3	30.489	1000										Intercept	b	40.463
Std-4	3	30.5525	1000		Regression Statistics
Std-4	3	30.701	1000		Multiple R	0.998661							Correlation Coefficient	R2	0.997
Std-4	3	30.7885	1000		R Square	0.997325							SE of intercept	EXCEL function (data analysis > regression > Third table)	0.114261
Std-4	3	30.8373	1000		Adjusted R Square	0.997246							SD of intercept	SE of intercept * √n (n= observations)	0.685565
Std-4	3	30.6249	1000		Standard Error	0.30064							LOD	3.3 (SD of intercept/slope)	0.684942	log10 copies
Std-5	2	34.1359	100		Observations	36							LOQ	10 (SD of intercept/slope)	2.07558	log10 copies
Std-5	2	33.4131	100
Std-5	2	34.0463	100		ANOVA
Std-5	2	34.0261	100			df	SS	MS	F	Significance F			LOD		4.84108	copies	This should be a Ct value of 36 for IFNy
Std-5	2	34.2956	100		Regression	1	1145.54	1145.54	12674.1	2.50797e-45			LOQ		119.009	copies
Std-5	2	33.7731	100		Residual	34	3.07307	0.0903844
Std-6	1	37.4097	10		Total	35	1148.61
Std-6	1	37.0495	10
Std-6	1	37.056	10			Coefficients	Standard Error	t Stat	P-value	Lower 95%	Upper 95%	Lower 95.0%	Upper 95.0%
Std-6	1	37.1506	10		Intercept	40.463	0.114261	354.129	3.12406e-62	40.2308	40.6952	40.2308	40.6952
Std-6	1	36.9473	10		X Variable 1	-3.30302	0.0293395	-112.579	2.50797e-45	-3.36264	-3.24339	-3.36264	-3.24339
Std-6	1	36.1964	10
Std-7	0	37.2027	1
Std-7	0	39.3868	1
Std-7	0	38.0152	1
Std-7	0	37.3491	1
Std-7	0	37.9868	1
Std-7	0	38.182	1

## Sheet: Raw data CFX Run
Sample	Content	Cq		SQ copies/ul	Detection rate (X detected / Y replicates)
IL-4	Std-01	18.79	18.8167	1000000	6 / 6
IL-4	Std-01	19.01		1000000
IL-4	Std-01	18.85		1000000
IL-4	Std-01	18.87		1000000
IL-4	Std-01	18.56		1000000
IL-4	Std-01	18.82		1000000
IL-4	Std-02	22.1	22.0033	100000	6 / 6
IL-4	Std-02	22.2		100000
IL-4	Std-02	22.13		100000
IL-4	Std-02	21.92		100000
IL-4	Std-02	21.9		100000
IL-4	Std-02	21.77		100000
IL-4	Std-03	25.79	25.355	10000	6 / 6
IL-4	Std-03	25.24		10000
IL-4	Std-03	25.28		10000
IL-4	Std-03	25.42		10000
IL-4	Std-03	25.19		10000
IL-4	Std-03	25.21		10000
IL-4	Std-04	28.91	28.7	1000	6 / 6
IL-4	Std-04	29.19		1000
IL-4	Std-04	28.4		1000
IL-4	Std-04	28.57		1000
IL-4	Std-04	28.5		1000
IL-4	Std-04	28.63		1000
IL-4	Std-05	32.02	32.1583	100	6 / 6
IL-4	Std-05	32.47		100
IL-4	Std-05	31.87		100
IL-4	Std-05	32.23		100
IL-4	Std-05	32.15		100
IL-4	Std-05	32.21		100
IL-4	Std-06	35.97	35.5333	10	6 / 6
IL-4	Std-06	35.57		10
IL-4	Std-06	35.07		10
IL-4	Std-06	35.74		10
IL-4	Std-06	34.94		10
IL-4	Std-06	35.91		10
IL-4	Std-07	38.76	38.286	1	5/ 6
IL-4	Std-07	38.27		1
IL-4	Std-07	39.22		1
IL-4	Std-07	36.77		1
IL-4	Std-07	38.41		1
IL-4	Std-07	0		1
Sample	Content	Cq		SQ copies/ul	Detection rate (X detected / Y replicates)
IFNy	Std-1	20.69	20.6	1000000	6 / 6
IFNy	Std-1	20.58		1000000
IFNy	Std-1	20.69		1000000
IFNy	Std-1	20.47		1000000
IFNy	Std-1	20.57		1000000
IFNy	Std-1	20.57		1000000
IFNy	Std-2	23.95	23.768	100000	6 / 6
IFNy	Std-2	23.58		100000
IFNy	Std-2	23.63		100000
IFNy	Std-2	23.84		100000
IFNy	Std-2	23.84		100000
IFNy	Std-2	23.74		100000
IFNy	Std-3	28.12	27.462	10000	6 / 6
IFNy	Std-3	26.99		10000
IFNy	Std-3	27.43		10000
IFNy	Std-3	27.39		10000
IFNy	Std-3	27.38		10000
IFNy	Std-3	27.54		10000
IFNy	Std-4	30.49	30.674	1000	6 / 6
IFNy	Std-4	30.55		1000
IFNy	Std-4	30.7		1000
IFNy	Std-4	30.79		1000
IFNy	Std-4	30.84		1000
IFNy	Std-4	30.63		1000
IFNy	Std-5	34.14	33.986	100	6 / 6
IFNy	Std-5	33.41		100
IFNy	Std-5	34.05		100
IFNy	Std-5	34.03		100
IFNy	Std-5	34.3		100
IFNy	Std-5	33.77		100
IFNy	Std-6	37.41	37.124	10	6 / 6
IFNy	Std-6	37.05		10
IFNy	Std-6	37.06		10
IFNy	Std-6	37.15		10
IFNy	Std-6	36.95		10
IFNy	Std-6	36.2		10
IFNy	Std-07	37.2027	38.0204	1	6 / 6	BUT VERY HIGH CT VALUES, BELOW LOQ FOR qPCR
IFNy	Std-07	39.3868		1
IFNy	Std-07	38.0152		1
IFNy	Std-07	37.3491		1
IFNy	Std-07	37.9868		1
IFNy	Std-07	38.182		1
