# Supplementary material for: Cytokine RT-qPCR and ddPCR for immunological investigations of the endangered Australian sea lion (Neophoca cinerea) and other mammals
Source: PeerJ. 2020 Nov 13;8:e10306. doi: 10.7717/peerj.10306 (PMC7668205; doi:10.7717/peerj.10306)
Supplement: Supplemental Information 6 — Excel spreadsheets with the standard curves and calculations for Limit of detection and limit of quantification for IL-4 and IFNy primer sets described in the manuscript. [file peerj-08-10306-s006.xlsx]

## Sheet: IL-4_5ul cDNA input
IL-4		(20 ul PCR reaction)		6 ul cDNA input			Gblock standard
Well	Sample	Copies/20uL Well	Concentration (Copies/μl of PCR reaction mix)	Copies Per 20uL Well / quantity of cDNA used per reaction	Detection rate (X detected / Y replicates)	MEAN Copies per 20uL Well / quantity of cDNA used per reaction	Expected Copy numbers (Std) (copies/ul used per reaction)	Std deviation	Std error
A01	Std 1 10^3	1572	78.6	262	3/3	212.444	200	43.5384	25.1369
A02	Std 1 10^3	1170	58.5	195			200
A03	Std 1 10^3	1082	54.1	180.333			200
B01	Std 2 1:5	210	10.5	35	3/3	40.6667	40	6.88799	3.97678
B02	Std 2 1:5	232	11.6	38.6667			40
B03	Std 2 1:5	290	14.5	48.3333			40
C01	Std 3 1:25	46.6	2.33	7.76667	3/3	8.21111	8	1.84069	1.06272
C02	Std 3 1:25	61.4	3.07	10.2333			8
C03	Std 3 1:25	39.8	1.99	6.63333			8
D01	Std 4 1:125	10.08	0.504	1.68	3/3	2.72556	1.6	1.15581	0.667306
D02	Std 4 1:125	15.18	0.759	2.53			1.6
D03	Std 4 1:125	23.8	1.19	3.96667			1.6
E01	Std 5 1:625	4.12	0.206	0.686667	3/3	0.998889	0.32	0.629377	0.363371
E02	Std 5 1:625	10.34	0.517	1.72333			0.32
E03	Std 5 1:625	3.52	0.176	0.586667			0.32
F01	Std 6 1:3125	2.68	0.134	0.446667	2/2	0.352222	0.064	1.89466	0.182314
F02	Std 6 1:3125	0	0	0			0.064
F03	Std 6 1:3125	3.66	0.183	0.61			0.064
G01	Std 7 :15625	0	0	0	2/2	1.08556	0.0128
G02	Std 7 :15625	12.12	0.606	2.02			0.0128
G03	Std 7 :15625	7.42	0.371	1.23667			0.0128
H01	NTC	0	0	0	NTC		0
Line of best fit done with average of replicates
Linear regression:	Y=aX + b
MEAN replicates (x)	Expected Copy numbers (Std) (copies/ul) (y)	Std deviation
212.444	200	43.5384
40.6667	40	6.88799
8.21111	8	1.84069
2.72556	1.6	1.15581
0.998889	0.32	0.629377
0.352222	0.064	1.89466
	Data Analysis Regression (Excel--> Data --> Data Analysis --> Regression
REGRESSION SUMMARY OUTPUT
Regression Statistics
Multiple R	0.999931
R Square	0.999863
Adjusted R Square	0.999828
Standard Error	1.03561
Observations	6
ANOVA
	df	SS	MS	F	Significance F
Regression	1	31247	31247	29135.3	7.06662e-09
Residual	4	4.28992	1.07248
Total	5	31251.3
	Coefficients	Standard Error	t Stat	P-value	Lower 95%	Upper 95%	Lower 95.0%	Upper 95.0%
Intercept	-0.0571944	0.488355	-0.117117	0.912413	-1.41308	1.2987	-1.41308	1.2987
Mean (x)	0.943211	0.00552585	170.691	7.06662e-09	0.927869	0.958553	0.927869	0.958553
RESULTS LOD/LOQ
IL-4
Parameter	Meaning	Value
Slope	a	0.943211
Intercept	b	-0.0571944
Correlation Coefficient	R2	0.999863
SE of intercept	EXCEL function (data analysis > regression > Third table)	0.488355
SD of intercept	SE of intercept * √n (n= observations)	1.19622
LOD	3.3 (SD of intercept/slope)	4.1852
LOQ	10 (SD of intercept/slope)	12.6824

## Sheet: IFNy_5ul cDNA input
IFNy		(20 ul PCR reaction)		6 ul cDNA input			Gblock standard
Well	Sample	Copies/20uL Well	Concentration (Copies/μl of PCR reaction mix)	Copies Per 20uL Well / quantity of cDNA used per reaction	Detection rate (X detected / Y replicates)	MEAN Copies per 20uL Well / quantity of cDNA used per reaction	Expected Copy numbers (Std) (copies/ul used per reaction)	Std deviation	Std error
A01	Std 1 10^3	802	40.1	133.667	3/3	130.778	150	6.80958	3.93151
A02	Std 1 10^3	814	40.7	135.667			150
A03	Std 1 10^3	738	36.9	123			150
B01	Std 2 1:5	126	6.3	21	3/3	26.7	30	4.9881	2.87988
B02	Std 2 1:5	181.6	9.08	30.2667			30
B03	Std 2 1:5	173	8.65	28.8333			30
C01	Std 3 1:25	21	1.05	3.5	3/3	4.24444	6	1.06684	0.615941
C02	Std 3 1:25	32.8	1.64	5.46667			6
C03	Std 3 1:25	22.6	1.13	3.76667			6
D01	Std 4 1:125	17.96	0.898	2.99333	3/3	2.10444	1.2	1.4285	0.824743
D02	Std 4 1:125	2.74	0.137	0.456667			1.2
D03	Std 4 1:125	17.18	0.859	2.86333			1.2
E01	Std 5 1:625	0	0	0	1/3	0.151111	0.24	0.261732	0.151111
E02	Std 5 1:625	0	0	0			0.24
E03	Std 5 1:625	2.72	0.136	0.453333			0.24
F01	Std 6 1:3125	0	0	0	0	0	0.064	0	0
F02	Std 6 1:3125	0	0	0			0.064
F03	Std 6 1:3125	0	0	0			0.064
G01	Std 7 :15625	0	0	0	0	0	0.048	0	0
G02	Std 7 :15625	0	0	0			0.048
G03	Std 7 :15625	0	0	0			0.048
H01	NTC	0	0	0	0		0
Line of best fit done with average of replicates
For linear regression:		Y=aX + b
Average replicates (copies/µL) (x)	Expected Copy numbers (Std) (copies/µL) (y)	Std error (for error bars)
130.778	140	6.80958
26.7	28	4.9881
4.24444	5.6	1.06684
2.10444	1.12	1.4285
0.151111	0.224	0.261732
Data Analysis Regression (Excel--> Data --> Data Analysis --> Regression
SUMMARY OUTPUT
Regression Statistics
Multiple R	0.999907
R Square	0.999813
Adjusted R Square	0.999751
Standard Error	0.943083
Observations	5
ANOVA
	df	SS	MS	F	Significance F
Regression	1	14292.9	14292.9	16070.2	1.08229e-06
Residual	3	2.66822	0.889406
Total	4	14295.6
	Coefficients	Standard Error	t Stat	P-value	Lower 95%	Upper 95%	Lower 95.0%	Upper 95.0%
Intercept	-0.135582	0.504631	-0.268676	0.805596	-1.74154	1.47038	-1.74154	1.47038
Average replicates (copies/µL) (x)	1.07101	0.00844857	126.768	1.08229e-06	1.04412	1.0979	1.04412	1.0979
IFNy
Parameter	Meaning	Value
Slope	a	1.07101
Intercept	b	-0.135582
Correlation Coefficient	R2	0.999813
SE of intercept	EXCEL function (data analysis > regression > Third table)	0.504631
SD of intercept	SE of intercept * √n (n= observations)	1.12839
LOD	3.3 (SD of intercept/slope)	3.47679
LOQ	10 (SD of intercept/slope)	10.5357
