# Supplementary material for: Cytokine RT-qPCR and ddPCR for immunological investigations of the endangered Australian sea lion (Neophoca cinerea) and other mammals
Source: PeerJ. 2020 Nov 13;8:e10306. doi: 10.7717/peerj.10306 (PMC7668205; doi:10.7717/peerj.10306)
Supplement: Supplemental Information 7 [file peerj-08-10306-s007.xlsx]

## Sheet: GAPDH N. cinerea
GAPDH Standards Australian sea lion
Well	Fluor	Target	Content	Sample	Cq	Cq Std. Dev
A01	SYBR	GAPDH	Std-1	NEAT	23.2271	0.10473
A02	SYBR	GAPDH	Std-1	NEAT	23.2046	0.10473
A03	SYBR	GAPDH	Std-1	NEAT	22.9945	0.10473
A04	SYBR	GAPDH	NTC		38.5748
B01	SYBR	GAPDH	Std-2	1:10	25.9539	0.106943
B02	SYBR	GAPDH	Std-2	1:10	26.0395	0.106943
B03	SYBR	GAPDH	Std-2	1:10	26.2111	0.106943
B04	SYBR	GAPDH	NTC
C01	SYBR	GAPDH	Std-3	1:100	29.1738	0.0431231
C02	SYBR	GAPDH	Std-3	1:100	29.0824	0.0431231
C03	SYBR	GAPDH	Std-3	1:100	29.0823	0.0431231
C04	SYBR	GAPDH	NRT		37.535
D01	SYBR	GAPDH	Std-4	1:1000	32.3785	0.144476
D02	SYBR	GAPDH	Std-4	1:1000	32.2138	0.144476
D03	SYBR	GAPDH	Std-4	1:1000	32.5675	0.144476
D04	SYBR	GAPDH	NRT		38.8986
E01	SYBR	GAPDH	Std-5	1:10000	35.7498	0.299748
E02	SYBR	GAPDH	Std-5	1:10000	36.3009	0.299748
E03	SYBR	GAPDH	Std-5	1:10000	35.6052	0.299748

## Sheet: IL-6 N. cinerea
IL-6 Standards N. cinerea
Well	Fluor	Target	Content	Replicate	Sample	Cq	Cq Mean	Cq Std. Dev
B01	SYBR	IL-6	Std-2	2	1:2	28.1532	28.2048	0.0881458
B02	SYBR	IL-6	Std-2	2	1:2	28.3066	28.2048	0.0881458
B03	SYBR	IL-6	Std-2	2	1:2	28.1547	28.2048	0.0881458
C01	SYBR	IL-6	Std-3	3	1:4	28.8921	28.8707	0.0357609
C02	SYBR	IL-6	Std-3	3	1:4	28.8906	28.8707	0.0357609
C03	SYBR	IL-6	Std-3	3	1:4	28.8294	28.8707	0.0357609
D01	SYBR	IL-6	Std-4	4	1:8	29.8819	29.8992	0.229308
D02	SYBR	IL-6	Std-4	4	1:8	29.679	29.8992	0.229308
D03	SYBR	IL-6	Std-4	4	1:8	30.1367	29.8992	0.229308
E01	SYBR	IL-6	Std-5	5	1:16	31.033	30.9294	0.103079
E02	SYBR	IL-6	Std-5	5	1:16	30.8269	30.9294	0.103079
E03	SYBR	IL-6	Std-5	5	1:16	30.9282	30.9294	0.103079
F01	SYBR	IL-6	Std-6	6	1:32	31.6795	31.896	0.212546
F02	SYBR	IL-6	Std-6	6	1:32	31.9041	31.896	0.212546
F03	SYBR	IL-6	Std-6	6	1:32	32.1044	31.896	0.212546
G01	SYBR	IL-6	Std-7	7	1:64	33.267	32.8565	0.38948
G02	SYBR	IL-6	Std-7	7	1:64	32.8102	32.8565	0.38948
G03	SYBR	IL-6	Std-7	7	1:64	32.4922	32.8565	0.38948
H01	SYBR	IL-6	Std-8	8	1:128	33.4511	34.065	0.641211
H02	SYBR	IL-6	Std-8	8	1:128	34.0137	34.065	0.641211
H03	SYBR	IL-6	Std-8	8	1:128	34.7304	34.065	0.641211

## Sheet: IFNy N. cinerea
IFNy Standards Australian sea lion
Well	Fluor	Target	Content	Replicate	Sample	Cq	Cq Mean	Cq Std. Dev
A01	SYBR	IFNy	Std-1	1	ASL	14.9158	15.0128	0.137185
A02	SYBR	IFNy	Std-1	1	ASL	15.1098	15.0128	0.137185
B01	SYBR	IFNy	Std-2	2	ASL	18.1416	18.1662	0.0347438
B02	SYBR	IFNy	Std-2	2	ASL	18.1907	18.1662	0.0347438
C01	SYBR	IFNy	Std-3	3	ASL	21.5762	21.5913	0.0213357
C02	SYBR	IFNy	Std-3	3	ASL	21.6064	21.5913	0.0213357
D01	SYBR	IFNy	Std-4	4	ASL	24.714	24.7681	0.0765155
D02	SYBR	IFNy	Std-4	4	ASL	24.8222	24.7681	0.0765155
E01	SYBR	IFNy	Std-5	5	ASL	28.0945	28.1146	0.028365
E02	SYBR	IFNy	Std-5	5	ASL	28.1346	28.1146	0.028365
F01	SYBR	IFNy	Std-6	6	ASL	30.7034	30.9911	0.406824
F02	SYBR	IFNy	Std-6	6	ASL	31.2787	30.9911	0.406824
G01	SYBR	IFNy	Std-7	7	ASL	33.7716	33.7071	0.0912409
G02	SYBR	IFNy	Std-7	7	ASL	33.6425	33.7071	0.0912409
H01	SYBR	IFNy	Std-8	8	ASL	34.6885	34.6162	0.102255
H02	SYBR	IFNy	Std-8	8	ASL	34.5439	34.6162	0.102255

## Sheet: IL-4 N. cinerea
IL-4 Standards Australian sea lion
Well	Fluor	Target	Content	Replicate	Sample	Cq	Cq Mean	Cq Std. Dev
A01	SYBR	ASL IL-4	Std-1	1	ASL IL-4	23.3356	23.3472	0.0163845
A02	SYBR	ASL IL-4	Std-1	1	ASL IL-4	23.3587	23.3472	0.0163845
B01	SYBR	ASL IL-4	Std-2	2	ASL IL-4	26.4096	26.5373	0.180716
B02	SYBR	ASL IL-4	Std-2	2	ASL IL-4	26.6651	26.5373	0.180716
C01	SYBR	ASL IL-4	Std-3	3	ASL IL-4	29.5672	29.4573	0.155365
C02	SYBR	ASL IL-4	Std-3	3	ASL IL-4	29.3475	29.4573	0.155365
D01	SYBR	ASL IL-4	Std-4	4	ASL IL-4	34.0244	33.8777	0.207449
D02	SYBR	ASL IL-4	Std-4	4	ASL IL-4	33.731	33.8777	0.207449
E01	SYBR	ASL IL-4	Std-5	5	ASL IL-4	35.6459	35.6459	0
E02	SYBR	ASL IL-4	Std-5	5	ASL IL-4		0	0
F01	SYBR	ASL IL-4	Std-6	6	ASL IL-4		0	0
F02	SYBR	ASL IL-4	Std-6	6	ASL IL-4		0	0
G01	SYBR	ASL IL-4	Std-7	7	ASL IL-4		0	0
G02	SYBR	ASL IL-4	Std-7	7	ASL IL-4		0	0
H01	SYBR	ASL IL-4	Std-8	8	ASL IL-4		0	0
H02	SYBR	ASL IL-4	Std-8	8	ASL IL-4		0	0

## Sheet: IL-10 N. cinerea
IL-10 Standards Australian sea lion
Well	Fluor	Target	Content	Replicate	Sample	Cq	Cq Mean	Cq Std. Dev
A01	SYBR	IL-10	Std-1	8	NEAT	28.9311	28.6532	0.240911
A02	SYBR	IL-10	Std-1	8	NEAT	28.5258	28.6532	0.240911
A03	SYBR	IL-10	Std-1	8	NEAT	28.5027	28.6532	0.240911
B01	SYBR	IL-10	Std-2	7	1:2	30.229	29.5972	0.548888
B02	SYBR	IL-10	Std-2	7	1:2	29.3247	29.5972	0.548888
B03	SYBR	IL-10	Std-2	7	1:2	29.2379	29.5972	0.548888
C01	SYBR	IL-10	Std-3	6	1:4	31.0426	30.5414	0.435039
C02	SYBR	IL-10	Std-3	6	1:4	30.3196	30.5414	0.435039
C03	SYBR	IL-10	Std-3	6	1:4	30.2619	30.5414	0.435039
D01	SYBR	IL-10	Std-4	5	1:8	31.2627	31.2711	0.0409765
D02	SYBR	IL-10	Std-4	5	1:8	31.3156	31.2711	0.0409765
D03	SYBR	IL-10	Std-4	5	1:8	31.235	31.2711	0.0409765
E01	SYBR	IL-10	Std-5	4	1:16	32.2364	32.2266	0.0138203
E02	SYBR	IL-10	Std-5	4	1:16	32.2266	32.2266	0.0138203
E03	SYBR	IL-10	Std-5	4	1:16	32.2168	32.2266	0.0138203
F01	SYBR	IL-10	Std-6	3	1:32	33.7024	32.985	0.85821
F02	SYBR	IL-10	Std-6	3	1:32	32.0342	32.985	0.85821
F03	SYBR	IL-10	Std-6	3	1:32	33.2184	32.985	0.85821
G01	SYBR	IL-10	Std-7	2	1:64	33.8133	34.1048	0.252433
G02	SYBR	IL-10	Std-7	2	1:64	34.2513	34.1048	0.252433
G03	SYBR	IL-10	Std-7	2	1:64	34.2497	34.1048	0.252433
H01	SYBR	IL-10	Std-8	1	1:128	36.0324	35.8481	0.506642
H02	SYBR	IL-10	Std-8	1	1:128	36.2368	35.8481	0.506642
H03	SYBR	IL-10	Std-8	1	1:128	35.2751	35.8481	0.506642

## Sheet: TNF N. cinerea
TNF Standards Australian sea lion (Neophoca cinerea)
Well	Fluor	Target	Content	Replicate	Sample	Cq	Cq Mean	Cq Std. Dev
A02	SYBR	TNF	Std-3	3	9	30.4555	30.6593	0.214297
G01	SYBR	TNF	Std-3	3	9	30.8827	30.6593	0.214297
H01	SYBR	TNF	Std-3	3	9	30.6398	30.6593	0.214297
B02	SYBR	TNF	Std-4	4	27	31.6936	31.5456	0.129786
C02	SYBR	TNF	Std-4	4	27	31.4923	31.5456	0.129786
D02	SYBR	TNF	Std-4	4	27	31.451	31.5456	0.129786
E02	SYBR	TNF	Std-5	5	81	33.4787	33.0478	0.537368
F02	SYBR	TNF	Std-5	5	81	33.2189	33.0478	0.537368
G02	SYBR	TNF	Std-5	5	81	32.4457	33.0478	0.537368
A03	SYBR	TNF	Std-6	6	243	34.3466	34.5612	0.272258
B03	SYBR	TNF	Std-6	6	243	34.8675	34.5612	0.272258
H02	SYBR	TNF	Std-6	6	243	34.4696	34.5612	0.272258
C03	SYBR	TNF	Std-7	7	729	36.6309	36.2106	0.51841
D03	SYBR	TNF	Std-7	7	729	36.3695	36.2106	0.51841
E03	SYBR	TNF	Std-7	7	729	35.6313	36.2106	0.51841
F03	SYBR	TNF	Std-8	8	2187		0	0
G03	SYBR	TNF	Std-8	8	2187	39.1937	38.9674	0.31996
H03	SYBR	TNF	Std-8	8	2187	38.7412	38.9674	0.31996
