# Supplementary material for: Cytokine RT-qPCR and ddPCR for immunological investigations of the endangered Australian sea lion (Neophoca cinerea) and other mammals
Source: PeerJ. 2020 Nov 13;8:e10306. doi: 10.7717/peerj.10306 (PMC7668205; doi:10.7717/peerj.10306)
Supplement: Supplemental Information 8 [file peerj-08-10306-s008.xlsx]

## Sheet: GAPDH C. familiaris
GAPDH Standards DOG (Canis familiaris)
Well	Fluor	Target	Content	Sample	Cq	Cq Std. Dev	Cq Mean	Cq Std. Dev
D01	SYBR	GAPDH	Std-4	4	Dog GAPDH	24.9607	25.0317	0.100397
D02	SYBR	GAPDH	Std-4	4	Dog GAPDH	25.1027	25.0317	0.100397
E01	SYBR	GAPDH	Std-5	5	Dog GAPDH	27.9738	27.9795	0.00812899
E02	SYBR	GAPDH	Std-5	5	Dog GAPDH	27.9853	27.9795	0.00812899
F01	SYBR	GAPDH	Std-6	6	Dog GAPDH	30.3551	30.4737	0.167786
F02	SYBR	GAPDH	Std-6	6	Dog GAPDH	30.5924	30.4737	0.167786
G01	SYBR	GAPDH	Std-7	7	Dog GAPDH	32.7514	32.7923	0.0579062
G02	SYBR	GAPDH	Std-7	7	Dog GAPDH	32.8333	32.7923	0.0579062
H01	SYBR	GAPDH	Std-8	8	Dog GAPDH	35.6782	35.5504	0.180704
H02	SYBR	GAPDH	Std-8	8	Dog GAPDH	35.4226	35.5504	0.180704

## Sheet: IL-6 C. familiaris
IL-6 Standards DOG (Canis familiaris)
Well	Fluor	Target	Content	Sample	Cq	Cq Std. Dev	Cq Mean	Cq Std. Dev
A01	SYBR	IL-6	Std-1	1	Dog Il-6	20.2506	20.2604	0.0138352
A02	SYBR	IL-6	Std-1	1	Dog Il-6	20.2702	20.2604	0.0138352
B01	SYBR	IL-6	Std-2	2	Dog Il-6	24.0785	24.0377	0.0576795
B02	SYBR	IL-6	Std-2	2	Dog Il-6	23.9969	24.0377	0.0576795
C01	SYBR	IL-6	Std-3	3	Dog Il-6	27.1569	27.1638	0.00974712
C02	SYBR	IL-6	Std-3	3	Dog Il-6	27.1707	27.1638	0.00974712
D01	SYBR	IL-6	Std-4	4	Dog Il-6	30.9414	30.6947	0.348917
D02	SYBR	IL-6	Std-4	4	Dog Il-6	30.448	30.6947	0.348917
E01	SYBR	IL-6	Std-5	5	Dog Il-6	33.9756	33.9341	0.0587733
E02	SYBR	IL-6	Std-5	5	Dog Il-6	33.8925	33.9341	0.0587733
F01	SYBR	IL-6	Std-6	6	Dog Il-6	36.9089	36.9089	0
F02	SYBR	IL-6	Std-6	6	Dog Il-6		0	0
G01	SYBR	IL-6	Std-7	7	Dog Il-6		0	0
G02	SYBR	IL-6	Std-7	7	Dog Il-6		0	0
H01	SYBR	IL-6	Std-8	8	Dog Il-6		0	0
H02	SYBR	IL-6	Std-8	8	Dog Il-6		0	0

## Sheet: IFNy C. familiaris
IFNy Standards DOG (Canis familiaris)
Well	Fluor	Target	Content	Sample	Cq	Cq Std. Dev	Cq Mean	Cq Std. Dev
A11	SYBR	IFNy	Std-09	9	Dog	20.7606	20.8996	0.196541
A12	SYBR	IFNy	Std-09	9	Dog	21.0386	20.8996	0.196541
B11	SYBR	IFNy	Std-10	10	Dog	24.2195	24.2449	0.0358466
B12	SYBR	IFNy	Std-10	10	Dog	24.2702	24.2449	0.0358466
C11	SYBR	IFNy	Std-11	11	Dog	27.124	27.3499	0.319484
C12	SYBR	IFNy	Std-11	11	Dog	27.5758	27.3499	0.319484
D11	SYBR	IFNy	Std-12	12	Dog	30.622	30.8855	0.372628
D12	SYBR	IFNy	Std-12	12	Dog	31.149	30.8855	0.372628
E11	SYBR	IFNy	Std-13	13	Dog	33.3197	33.8017	0.681587
E12	SYBR	IFNy	Std-13	13	Dog	34.2836	33.8017	0.681587

## Sheet: IL-4 C. familiaris
IL-4 Standards DOG (Canis familiaris)
Well	Fluor	Target	Content	Sample	Cq	Cq Std. Dev	Cq Mean	Cq Std. Dev
A01	SYBR	IL-4	Std-1	1	Dog	19.7266	19.9499	0.315745
A02	SYBR	IL-4	Std-1	1	Dog	20.1731	19.9499	0.315745
B01	SYBR	IL-4	Std-2	2	Dog	23.2746	23.4057	0.185452
B02	SYBR	IL-4	Std-2	2	Dog	23.5369	23.4057	0.185452
C01	SYBR	IL-4	Std-3	3	Dog	27.8763	27.207	0.946475
C02	SYBR	IL-4	Std-3	3	Dog	26.5378	27.207	0.946475
D01	SYBR	IL-4	Std-4	4	Dog	30.2221	30.1788	0.0613354
D02	SYBR	IL-4	Std-4	4	Dog	30.1354	30.1788	0.0613354
E01	SYBR	IL-4	Std-5	5	Dog	33.5668	33.373	0.274122
E02	SYBR	IL-4	Std-5	5	Dog	33.1791	33.373	0.274122
F01	SYBR	IL-4	Std-6	6	Dog	37.0851	36.163	1.30413
F02	SYBR	IL-4	Std-6	6	Dog	35.2408	36.163	1.30413
G01	SYBR	IL-4	Std-7	7	Dog		0	0
G02	SYBR	IL-4	Std-7	7	Dog		0	0
H01	SYBR	IL-4	Std-8	8	Dog		0	0
H02	SYBR	IL-4	Std-8	8	Dog		0	0

## Sheet: IL-10 C. familiaris
IL-10 Standards DOG (Canis familiaris)
Well	Fluor	Target	Content	Sample	Cq	Cq Std. Dev	Cq Mean	Cq Std. Dev
A01	SYBR	IL-10	Std-1	1	Dog Il-10	19.875	20.002	0.179659
A02	SYBR	IL-10	Std-1	1	Dog Il-10	20.1291	20.002	0.179659
B01	SYBR	IL-10	Std-2	2	Dog Il-10	23.422	23.4627	0.0575089
B02	SYBR	IL-10	Std-2	2	Dog Il-10	23.5033	23.4627	0.0575089
C01	SYBR	IL-10	Std-3	3	Dog Il-10	26.8847	26.9125	0.0392637
C02	SYBR	IL-10	Std-3	3	Dog Il-10	26.9402	26.9125	0.0392637
D01	SYBR	IL-10	Std-4	4	Dog Il-10	30.203	30.1806	0.0315819
D02	SYBR	IL-10	Std-4	4	Dog Il-10	30.1583	30.1806	0.0315819
E01	SYBR	IL-10	Std-5	5	Dog Il-10	33.5525	33.6595	0.151351
E02	SYBR	IL-10	Std-5	5	Dog Il-10	33.7665	33.6595	0.151351
F01	SYBR	IL-10	Std-6	6	Dog Il-10	34.0069	35.0946	1.53829
F02	SYBR	IL-10	Std-6	6	Dog Il-10	36.1824	35.0946	1.53829

## Sheet: TNF C. familiaris
TNF Standards DOG (Canis familiaris)
Well	Fluor	Target	Content	Sample	Cq	Cq Std. Dev	Cq Mean	Cq Std. Dev
C07	SYBR	TNF set 26	Std-27	27	TNF set 26	31.374	31.6541	0.39618
C08	SYBR	TNF set 26	Std-27	27	TNF set 26	31.9342	31.6541	0.39618
D07	SYBR	TNF set 26	Std-28	28	TNF set 26	33.0251	32.9214	0.146718
D08	SYBR	TNF set 26	Std-28	28	TNF set 26	32.8177	32.9214	0.146718
E07	SYBR	TNF set 26	Std-29	29	TNF set 26	34.0276	33.9334	0.133273
E08	SYBR	TNF set 26	Std-29	29	TNF set 26	33.8392	33.9334	0.133273
F07	SYBR	TNF set 26	Std-30	30	TNF set 26	34.3183	34.9208	0.851998
F08	SYBR	TNF set 26	Std-30	30	TNF set 26	35.5232	34.9208	0.851998
G07	SYBR	TNF set 26	Std-31	31	TNF set 26	35.8658	35.5776	0.407656
G08	SYBR	TNF set 26	Std-31	31	TNF set 26	35.2893	35.5776	0.407656
