# Supplementary material for: Cytokine RT-qPCR and ddPCR for immunological investigations of the endangered Australian sea lion (Neophoca cinerea) and other mammals
Source: PeerJ. 2020 Nov 13;8:e10306. doi: 10.7717/peerj.10306 (PMC7668205; doi:10.7717/peerj.10306)
Supplement: Supplemental Information 9 [file peerj-08-10306-s009.xlsx]

## Sheet: GAPDH B. taurus
GAPDH Standards DOG (Bos taurus)
Well	Fluor	Target	Content	Replicate	Sample	Cq	Cq Mean	Cq Std. Dev
A01	SYBR	GAPDH	Std-1	1	Cattle GAPDH	22.6504	22.6782	0.0393641
A02	SYBR	GAPDH	Std-1	1	Cattle GAPDH	22.706	22.6782	0.0393641
B01	SYBR	GAPDH	Std-2	2	Cattle GAPDH	26.1934	26.1892	0.00581998
B02	SYBR	GAPDH	Std-2	2	Cattle GAPDH	26.1851	26.1892	0.00581998
C01	SYBR	GAPDH	Std-3	3	Cattle GAPDH	29.3162	29.3267	0.0149589
C02	SYBR	GAPDH	Std-3	3	Cattle GAPDH	29.3373	29.3267	0.0149589
D01	SYBR	GAPDH	Std-4	4	Cattle GAPDH	33.1074	33.3311	0.316312
D02	SYBR	GAPDH	Std-4	4	Cattle GAPDH	33.5547	33.3311	0.316312
E01	SYBR	GAPDH	Std-5	5	Cattle GAPDH	35.8356	36.1243	0.408229
E02	SYBR	GAPDH	Std-5	5	Cattle GAPDH	36.413	36.1243	0.408229
F01	SYBR	GAPDH	Std-6	6	Cattle GAPDH	40.7512	38.9344	2.56934
F02	SYBR	GAPDH	Std-6	6	Cattle GAPDH	37.1176	38.9344	2.56934

## Sheet: IL-10 B. taurus
IL-10 Standards DOG (Bos taurus)
Well	Fluor	Target	Content	Replicate	Sample	Cq	Cq Mean	Cq Std. Dev
A01	SYBR	Il-10 Cattle	Std-1	1	Cattle IL10	20.0347	20.0401	0.00759762
A02	SYBR	Il-10 Cattle	Std-1	1	Cattle IL10	20.0455	20.0401	0.00759762
B01	SYBR	Il-10 Cattle	Std-2	2	Cattle IL10	23.0637	23.1193	0.0785756
B02	SYBR	Il-10 Cattle	Std-2	2	Cattle IL10	23.1748	23.1193	0.0785756
C01	SYBR	Il-10 Cattle	Std-3	3	Cattle IL10	26.3257	26.3759	0.0709513
C02	SYBR	Il-10 Cattle	Std-3	3	Cattle IL10	26.4261	26.3759	0.0709513
D01	SYBR	Il-10 Cattle	Std-4	4	Cattle IL10	30.1523	29.9578	0.275123
D02	SYBR	Il-10 Cattle	Std-4	4	Cattle IL10	29.7632	29.9578	0.275123
E01	SYBR	Il-10 Cattle	Std-5	5	Cattle IL10	31.9298	32.0342	0.147578
E02	SYBR	Il-10 Cattle	Std-5	5	Cattle IL10	32.1385	32.0342	0.147578

## Sheet: TNF B. taurus
TNF Standards DOG (Bos taurus)
Well	Fluor	Target	Content	Replicate	Sample	Cq	Cq Mean	Cq Std. Dev
A01	SYBR	Il-10 Cattle	Std-1	1	Cattle TNF	20.2004	20.2281	0.0390823
A02	SYBR	Il-10 Cattle	Std-1	1	Cattle TNF	20.2557	20.2281	0.0390823
B01	SYBR	Il-10 Cattle	Std-2	2	Cattle TNF	23.672	23.6443	0.039101
B02	SYBR	Il-10 Cattle	Std-2	2	Cattle TNF	23.6167	23.6443	0.039101
C01	SYBR	Il-10 Cattle	Std-3	3	Cattle TNF	27.025	27.048	0.0325574
C02	SYBR	Il-10 Cattle	Std-3	3	Cattle TNF	27.0711	27.048	0.0325574
D01	SYBR	Il-10 Cattle	Std-4	4	Cattle TNF	30.693	30.6934	0.000587435
D02	SYBR	Il-10 Cattle	Std-4	4	Cattle TNF	30.6939	30.6934	0.000587435
E01	SYBR	Il-10 Cattle	Std-5	5	Cattle TNF	34.7398	34.8222	0.116407
E02	SYBR	Il-10 Cattle	Std-5	5	Cattle TNF	34.9045	34.8222	0.116407
F01	SYBR	Il-10 Cattle	Std-6	6	Cattle TNF		0	0
F02	SYBR	Il-10 Cattle	Std-6	6	Cattle TNF		0	0
