# Supplementary material for: Cytokine RT-qPCR and ddPCR for immunological investigations of the endangered Australian sea lion (Neophoca cinerea) and other mammals
Source: PeerJ. 2020 Nov 13;8:e10306. doi: 10.7717/peerj.10306 (PMC7668205; doi:10.7717/peerj.10306)
Supplement: Supplemental Information 10 [file peerj-08-10306-s010.xlsx]

## Sheet: GAPDH O. aries
GAPDH Sheep (Ovis aries)
Well	Fluor	Target	Content	Replicate	Sample	Cq	Cq Mean	Cq Std. Dev	Melt Temperature
A01	SYBR	GAPDH	Std-1	1	Sheep Gapdh	21.9403	22.0664	0.178213	84
A02	SYBR	GAPDH	Std-1	1	Sheep Gapdh	22.1924	22.0664	0.178213	83.5
B01	SYBR	GAPDH	Std-2	2	Sheep Gapdh	25.4203	25.4	0.0287498	83.5
B02	SYBR	GAPDH	Std-2	2	Sheep Gapdh	25.3797	25.4	0.0287498	83.5
C01	SYBR	GAPDH	Std-3	3	Sheep Gapdh	29.2626	29.0078	0.360411	83.5
C02	SYBR	GAPDH	Std-3	3	Sheep Gapdh	28.7529	29.0078	0.360411	83.5
D01	SYBR	GAPDH	Std-4	4	Sheep Gapdh	32.1709	32.2303	0.0840134	83.5
D02	SYBR	GAPDH	Std-4	4	Sheep Gapdh	32.2897	32.2303	0.0840134	83.5
E01	SYBR	GAPDH	Std-5	5	Sheep Gapdh	35.2175	35.5026	0.403212	83.5
E02	SYBR	GAPDH	Std-5	5	Sheep Gapdh	35.7878	35.5026	0.403212	83.5
F01	SYBR	GAPDH	Std-6	6	Sheep Gapdh	39.5118	38.3162	1.69087	83.5
F02	SYBR	GAPDH	Std-6	6	Sheep Gapdh	37.1205	38.3162	1.69087	83.5

## Sheet: IL-10 O. aries
IL-10 Sheep (Ovis aries)
Well	Fluor	Target	Content	Replicate	Sample	Cq	Cq Mean	Cq Std. Dev	Melt Temperature
A04	SYBR	IL 10 Sheep	Std-09	9	Sheep IL10	20.8915	20.8517	0.0562735	83
A05	SYBR	IL 10 Sheep	Std-09	9	Sheep IL10	20.8119	20.8517	0.0562735	83
B04	SYBR	IL 10 Sheep	Std-10	10	Sheep IL10	23.9272	23.995	0.0959782	83
B05	SYBR	IL 10 Sheep	Std-10	10	Sheep IL10	24.0629	23.995	0.0959782	83
C04	SYBR	IL 10 Sheep	Std-11	11	Sheep IL10	27.331	27.3793	0.0682658	83
C05	SYBR	IL 10 Sheep	Std-11	11	Sheep IL10	27.4276	27.3793	0.0682658	83
D04	SYBR	IL 10 Sheep	Std-12	12	Sheep IL10	30.8422	30.8731	0.0437337	83
D05	SYBR	IL 10 Sheep	Std-12	12	Sheep IL10	30.904	30.8731	0.0437337	83
E04	SYBR	IL 10 Sheep	Std-13	13	Sheep IL10	33.2129	33.2478	0.0493616	83
E05	SYBR	IL 10 Sheep	Std-13	13	Sheep IL10	33.2827	33.2478	0.0493616	83.5

## Sheet: TNF O. aries
Well	Fluor	Target	Content	Replicate	Sample	Cq	Cq Mean	Cq Std. Dev	Melt Temperature
A04	SYBR	TNF	Std-09	9	Sheep TNF	20.2945	20.293	0.00206373	86.5
A05	SYBR	TNF	Std-09	9	Sheep TNF	20.2915	20.293	0.00206373	86.5
B04	SYBR	TNF	Std-10	10	Sheep TNF	24.0318	24.0874	0.078552	86.5
B05	SYBR	TNF	Std-10	10	Sheep TNF	24.1429	24.0874	0.078552	86.5
C04	SYBR	TNF	Std-11	11	Sheep TNF	27.8769	27.7822	0.134001	86.5
C05	SYBR	TNF	Std-11	11	Sheep TNF	27.6874	27.7822	0.134001	86.5
D04	SYBR	TNF	Std-12	12	Sheep TNF	31.2983	31.1995	0.139718	86.5
D05	SYBR	TNF	Std-12	12	Sheep TNF	31.1007	31.1995	0.139718	86.5
E04	SYBR	TNF	Std-13	13	Sheep TNF	35.2367	35.159	0.109857	86.5
E05	SYBR	TNF	Std-13	13	Sheep TNF	35.0813	35.159	0.109857	86.5
F04	SYBR	TNF	Std-14	14	Sheep TNF		0	0	None
F05	SYBR	TNF	Std-14	14	Sheep TNF		0	0	None
