# Supplementary material for: Cytokine RT-qPCR and ddPCR for immunological investigations of the endangered Australian sea lion (Neophoca cinerea) and other mammals
Source: PeerJ. 2020 Nov 13;8:e10306. doi: 10.7717/peerj.10306 (PMC7668205; doi:10.7717/peerj.10306)
Supplement: Supplemental Information 11 — qPCR Neophoca cinerea sequence analysis results (Macrogen, Seoul, South Korea). [file peerj-08-10306-s011.xlsx]

## Sheet: Sheet1
Target	Macrogen Sequence Results	Query Length
IL-4	TCACCTCCCAACTGATTCCAACTCTGGTCTGATTACTAGCACTCACCAGCACCTTTGTCCATGGACATAACTTCAGTATTGCCATTAAAGAGATCATCAGAACGTTGAACATCCTCACAGCGAGAAACGACTCGTAA	135
IL-6	TCTGCTCCTGGTGATGGCTACTGCTTTCCCTACCCCGGGACCCCTGGCAGGAGATTCCAAGGATGATGCCACTTCAAATAGTCTACCACTCACCTCTGCAAACAAAGTGAAGGAAGGATGTCCTCGGCAAAATCTCTGCAA	141
IFNγ	TGACTCCTTTTCCG-TTCCTTAGGTTGGATCTTGGTGAGAGATCATTCATCACTTGATAGTCATAGGCTTGATGAGTTCATTTATCGCCTTGCGCTGGACCTGCAGATCATTCAC	112
IL-10	CTTTAAGGGTTACCTGGGTTGCCAAGCCTTGTCGGAGATGATCCAGTTCTACCTGGAGGAGGTGATGCCCCAGGCTGAGAACCACGACCCAGACATCA	98
TNFα	GAGCACTGAAAGCATGATCCGGGACGTGGAGCTGGCCGAGGAGGCACTCCCCGAGAAGGCAGGGGCCCCCAGGCTGGCCCCCAGGGCTCCAGAAGGTGCTTGTGCCTCAGCCTCTTCTCCTTCTTCCTGGTCGC	134
